# Supplementary material for: Ultra-low friction and patterning on atomically thin MoS2via electronic tight-binding
Source: Royal Society of Chemistry journal article supplement (doi:10.1039/d1nr04252a), 2021-01-01
Supplement: d1nr04252a1.pdf [file d1nr04252a1.pdf]

Supporting Information for  
Ultra-low Friction and Patterning on Atomically Thin MoS<sub>2</sub> via Electronic  
Tightly Binding

Bin Shi<sup>b</sup>, Xuehui Gan<sup>a,b</sup>, Haojie Lang<sup>b</sup>, Kun Zou<sup>b</sup>, Linfeng Wang<sup>c</sup>, Junhui Sun<sup>d</sup>, Yangyang Lu<sup>d</sup>,

Yitian Peng<sup>a,b,\*</sup>

a. Shanghai Collaborative Innovation Center for High Performance Fiber Composites, Donghua University, Shanghai 201620, China.

b. College of Mechanical Engineering, Donghua University, Shanghai 201620, China.

c. College of Mechanical & Electrical Engineering, Nanjing University of Aeronautics & Astronautics, Nanjing 211100, China.

d. School of Mechanical Engineering, State Key Laboratory of Traction Power, Southwest Jiaotong University, Chengdu 610031, China.

---

\* Yitian Peng Professor. Tel: +86 21 67874297. E-mail: [yitianpeng@dhu.edu.cn](mailto:yitianpeng@dhu.edu.cn) (Yitian Peng)

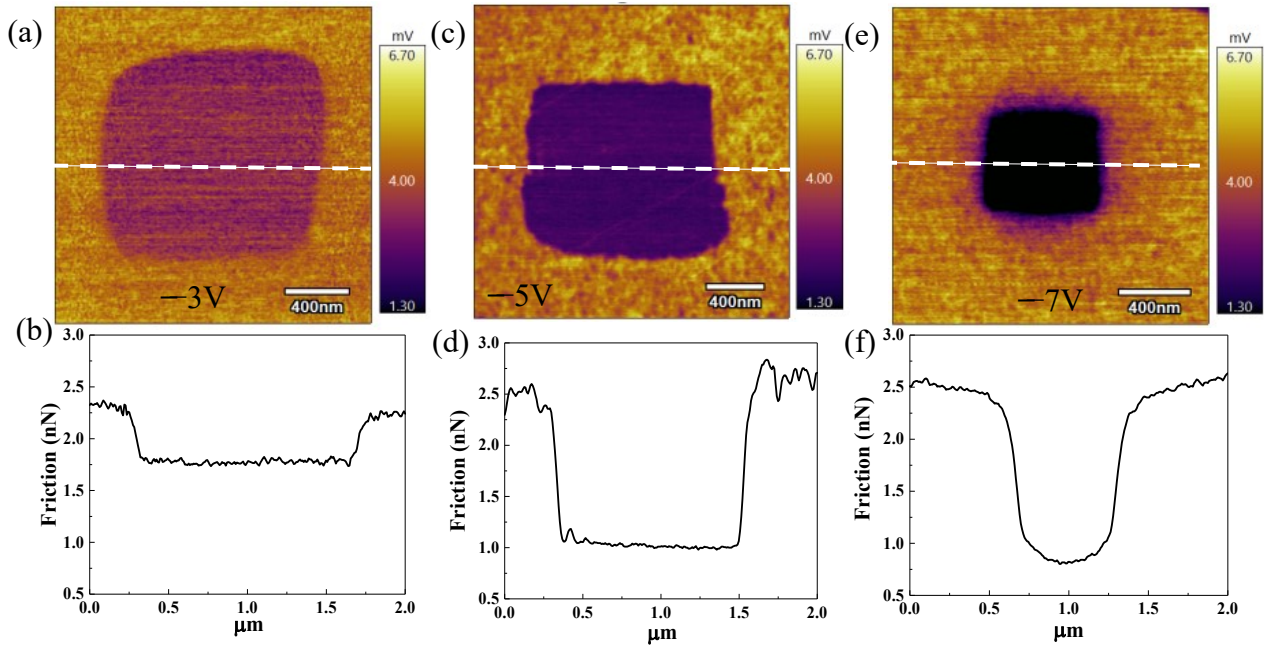

**Figure S1.** Friction maps of atomically thin MoS<sub>2</sub> after rubbing with different gate voltages and corresponding friction profiles with the applied load of 20 nN. (a, c, e) Friction maps of atomically thin MoS<sub>2</sub> after rubbing with gate voltages of -3 V, -5 V and -7 V, respectively. (b, d, f) Corresponding friction profiles along the white dotted lines.

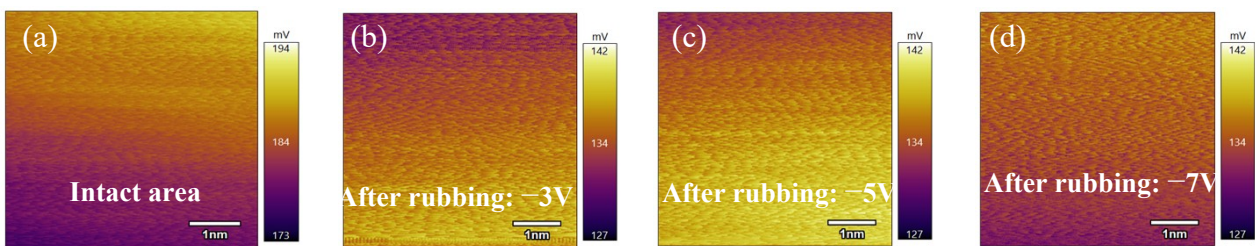

**Figure S2.** Lateral force maps measured on the intact area and the rubbed area of atomically thin MoS<sub>2</sub>. (a) Lateral force map measured on the intact area of atomically thin MoS<sub>2</sub>. (b, c and d) Lateral force maps measured on the rubbed area with gate voltages of -3V, -5V and -7V, respectively.

Calculation of the contact area between the atomically thin MoS<sub>2</sub> and AFM tip based on DMT model: AFM tip (Multi-75AL-G) used for friction tests was characterized using SEM (HITACHI S-4800) to measure the tip radius. The frictional values of MoS<sub>2</sub> in Figure 1(e) were used as the fitting data.

The general equation is <sup>[1]</sup>:

$$\frac{a}{a_0(\alpha)} = \left( \frac{\alpha + \sqrt{1 - L/L_c(\alpha)}}{1 + \alpha} \right)^{\frac{2}{3}} \quad (1)$$

Where  $L$  is the load,  $L_c$  is the pull-off force,  $a$  and  $a_0$  represent the contact radius at load  $L$  and at zero load, respectively.  $\alpha$  is a parameter which can be obtained from the fitting.  $F_0$  and  $L_c$  are acquired from DMT model. The values of  $F_0$  are  $0.71 \pm 0.08$ ,  $0.9 \pm 0.02$ ,  $1.51 \pm 0.014$ ,  $1.68 \pm 0.02$ , respectively.

In DTM model,  $L_c = -2\pi\gamma R$ . where  $R$  is the tip radius ( $\sim 30$  nm) and  $\gamma$  is the work of adhesion. At zero load,  $a_0$  is given by:

$$a_0 = \left( \frac{2\pi\gamma R^2}{K} \right)^{\frac{1}{3}} \quad (2)$$

where  $K$  is the combined elastic modulus of the tip and the sample, given by

$$K = \frac{4}{3} \left[ \frac{1 - \nu_t^2}{E_t} + \frac{1 - \nu_s^2}{E_s} \right]^{-1} \quad (3)$$

where  $E_t$  and  $E_s$  represent the Young's modulus of the tip and sample materials,  $\nu_t$  and  $\nu_s$  represent the respective Poisson ratios ( $E_t \sim 130$  GPa,  $E_s \sim 270$  GPa,  $\nu_t \sim 0.27$ ,  $\nu_s \sim 0.25$ ).<sup>[3,4]</sup> Combining eqs 1, 2, and 3, the calculated contact area at zero load at  $V_g = 0$  V,  $-3$  V,  $-5$  V, and  $-7$  V are  $22.05 \pm 0.39 \text{ nm}^2$ ,  $20.09 \pm 0.31 \text{ nm}^2$ ,  $16.46 \pm 0.28 \text{ nm}^2$  and  $13.9 \pm 0.22 \text{ nm}^2$ , respectively.

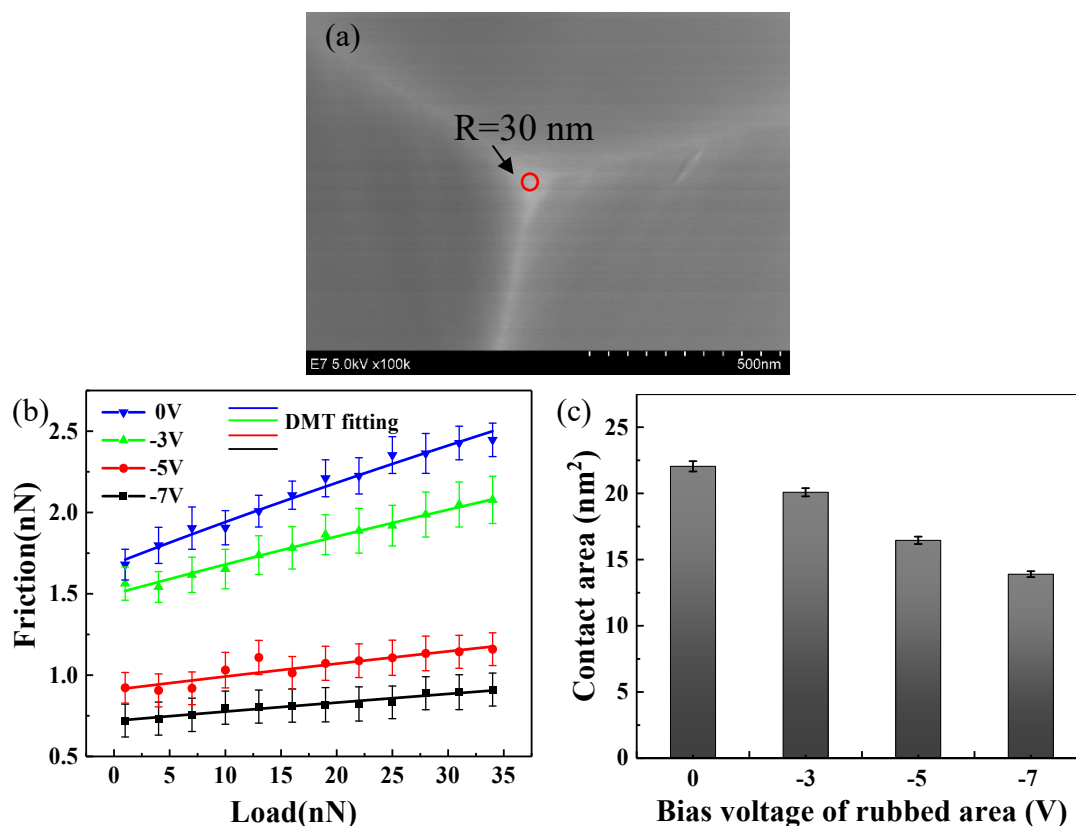

**Figure S3.** SEM image of the Si tip and friction as a function of load with different gate voltages. (a) SEM image of the Si tip used for friction tests. (b) Plot of the friction versus the applied load on the rubbed area of atomically thin MoS<sub>2</sub> with different gate voltages. Variation of the true contact areas during the tip sliding on atomically thin MoS<sub>2</sub> with different gate voltages based on DMT fit.

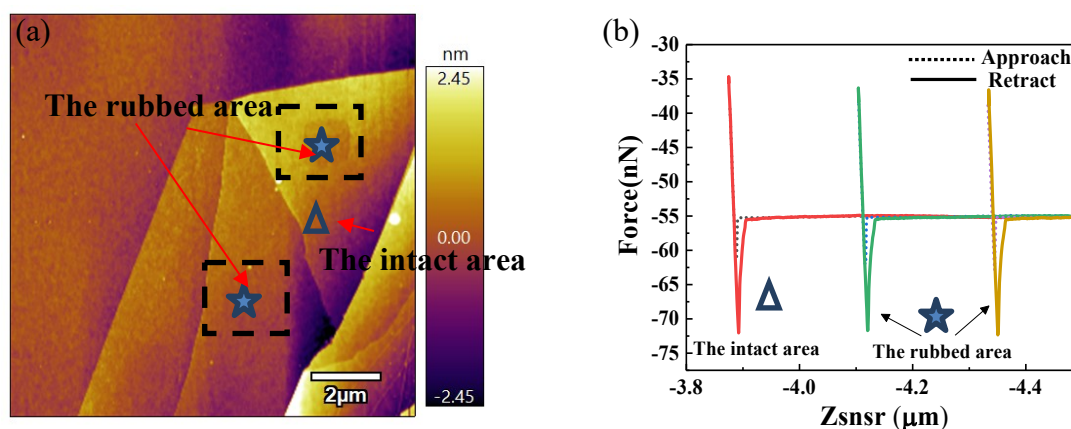

**Figure S4.** Pull-off force measurements on the rubbed area and the intact area of atomically thin MoS<sub>2</sub>. (a) AFM topography image of atomically thin MoS<sub>2</sub> after rubbing at the gate voltage of -6V. (b) Corresponding pull-off force curves acquired on the regions as marked on the rubbed area and the intact area by star and triangle in (a). Little difference in the pull-off force curves is observed between the two representative regions.

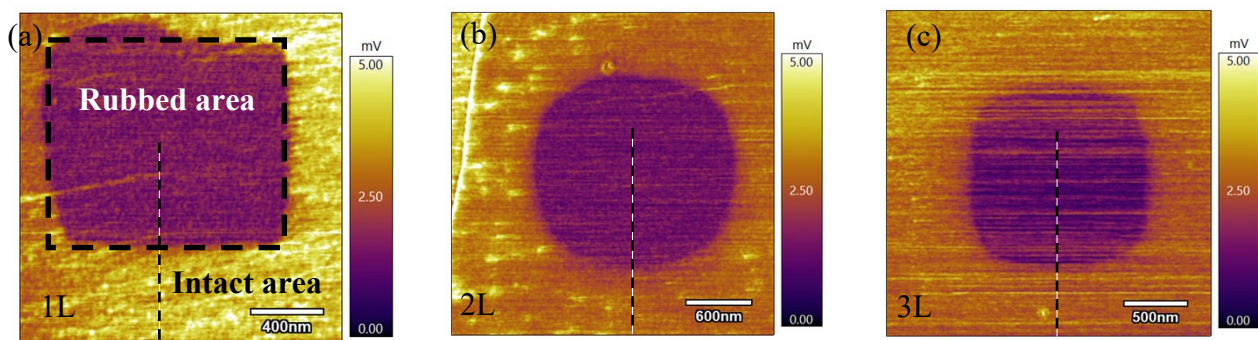

**Figure S5.** (a, b, c) Frictional maps measured on MoS<sub>2</sub> with different layer thicknesses under the applied load of 10 nN.

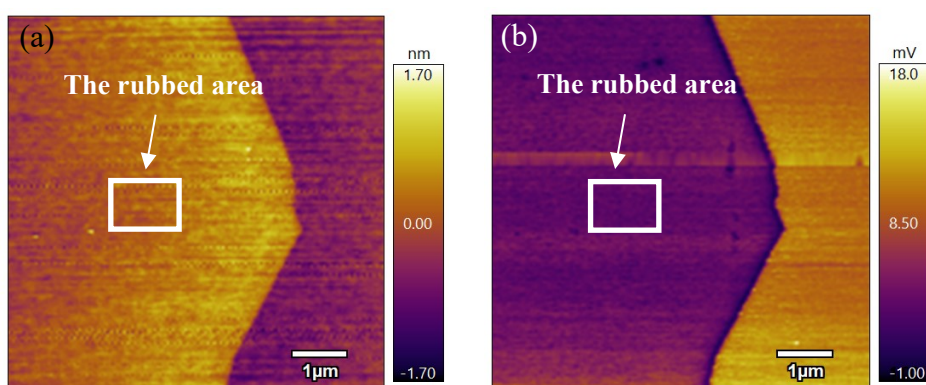

**Figure S6.** AFM topography image of atomically thin MoS<sub>2</sub> and friction map after rubbing. (a) The AFM topography of the atomically thin MoS<sub>2</sub> after rubbing at the gate voltage of +6V. (b) Friction map of atomically thin MoS<sub>2</sub> on SiO<sub>2</sub>/Si substrate (applied load of 25 nN) after rubbing at the gate voltage of +6V. The results indicated that the friction of the atomically thin MoS<sub>2</sub> does not show observable change after rubbing with the positive gate voltage.

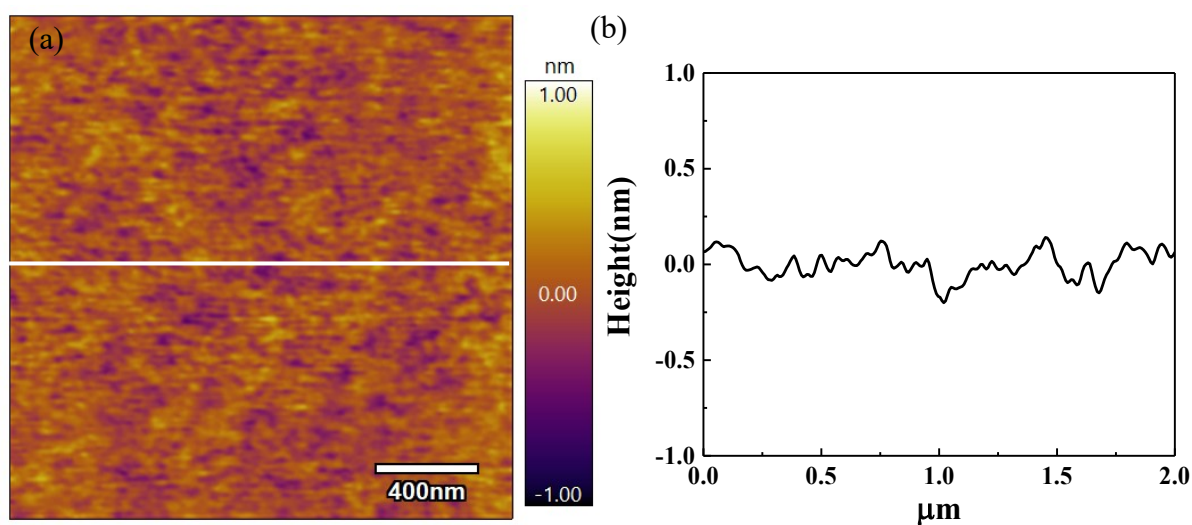

**Figure S7.** AFM topography image of SiO<sub>2</sub>/Si substrate. (a) Topographic image of SiO<sub>2</sub> surface. (b) The height profile of SiO<sub>2</sub> along the white line in (a). The surface roughness values Ra on a representative SiO<sub>2</sub>/Si substrate is 0.172 ( $\pm 0.006$ ) nm.

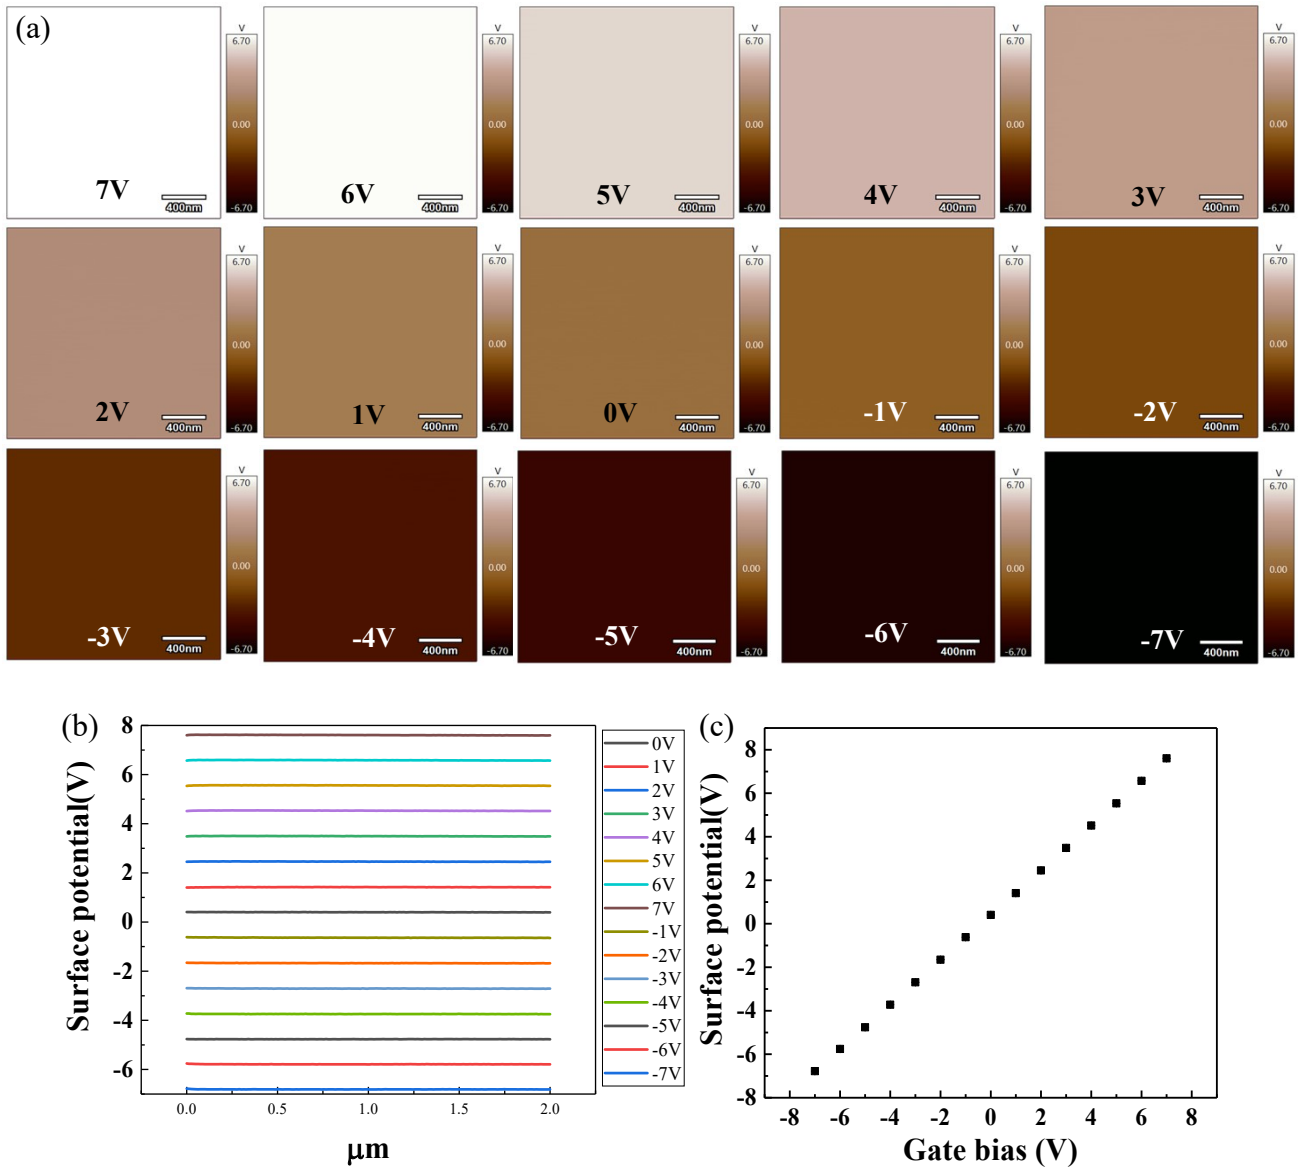

**Figure S8.** SKPM characterization and corresponding profiles with different gate voltages. (a-o) The surface potential images of SiO<sub>2</sub>/Si substrate with gate voltages from  $-7$  V to  $+7$  V. (p) The line profiles of the surface potentials along the conductive tip and SiO<sub>2</sub>/Si substrate with different gate voltages. (q) Surface potential difference between the conductive tip and SiO<sub>2</sub>/Si substrate as a function of different gate voltages.

## References

- [1] Ni Z. H., Wang H. M., Kasim J., et al. Graphene thickness determination using reflection and contrast spectroscopy. *Nano Letters* **2007**, 7(9):2758-2763.
- [2] Smithe K. K. H., English C. D., Suryavanshi S. V., et al. Intrinsic Electrical Transport and Performance Projections of Synthetic Monolayer MoS<sub>2</sub> Devices. *2D materials* **2016**, 4(1):

011009.

- [3] Castellanos-Gomez A., Poot M., Steele G. A., van der Zant H. S. J., Agrait N., Rubio-Bollinger G. Mechanical Properties of Freely Suspended Semiconducting Graphene-Like Layers Based on MoS<sub>2</sub>. *Nanoscale Research Letters* **2012**, 7:233.
- [4] Zeng X. Z., Peng Y. T., Lang H. J. A Novel Approach to Decrease Friction of Graphene. *Carbon* **2017**, 118: 233-240.
